# Supplementary material for: Fragranced consumer products: effects on autistic adults in the United States, Australia, and United Kingdom
Source: PubMed Central journal article supplement (PMC6244938; doi:10.1007/s11869-018-0625-x), 2018-09-25
Supplement: 11869_2018_625_MOESM1_ESM.pdf [file 11869_2018_625_MOESM1_ESM.pdf]

|                |                 |                     |                               |                                   |
|----------------|-----------------|---------------------|-------------------------------|-----------------------------------|
| <b>Table 1</b> | <b>Autistic</b> | <b>Non-Autistic</b> | <b>Autistic</b><br>US, AU, UK | <b>Non-Autistic</b><br>US, AU, UK |
| <b>Country</b> |                 |                     |                               |                                   |

|              | US      | AU      | UK      | US      | AU      | UK      |      |       |
|--------------|---------|---------|---------|---------|---------|---------|------|-------|
| <b>Total</b> | 49      | 41      | 52      | 1088    | 1057    | 1048    | 142  | 3193  |
|              | 4.300%  | 3.700%  | 4.700%  | 95.700% | 96.300% | 95.300% | 4.3% | 95.7% |
| <b>US</b>    | 1137    | -       | -       | 1137    | -       | -       |      |       |
|              | 100.00% | -       | -       | 100.00% | -       | -       |      |       |
| <b>AU</b>    | -       | 1098    | -       | -       | 1098    | -       |      |       |
|              | -       | 100.00% | -       | -       | 100.00% | -       |      |       |
| <b>UK</b>    | -       | -       | 1100    | -       | -       | 1100    |      |       |
|              | -       | -       | 100.00% | -       | -       | 100.00% |      |       |

|                |                 |                     |                               |                                   |
|----------------|-----------------|---------------------|-------------------------------|-----------------------------------|
| <b>Table 2</b> | <b>Autistic</b> | <b>Non-Autistic</b> | <b>Autistic</b><br>US, AU, UK | <b>Non-Autistic</b><br>US, AU, UK |
|----------------|-----------------|---------------------|-------------------------------|-----------------------------------|

What is your gender?

|               | US     | AU     | UK     | US     | AU     | UK     |       |       |
|---------------|--------|--------|--------|--------|--------|--------|-------|-------|
| <b>Total</b>  | 49     | 41     | 52     | 1088   | 1057   | 1048   |       |       |
| <b>Male</b>   | 33     | 24     | 34     | 492    | 519    | 516    |       |       |
| <b>Female</b> | 16     | 17     | 18     | 596    | 538    | 532    | 63.7% | 47.8% |
|               | 32.70% | 41.50% | 34.60% | 54.80% | 50.90% | 50.80% | 36.3% | 52.2% |

|                |                 |                     |                               |                                   |
|----------------|-----------------|---------------------|-------------------------------|-----------------------------------|
| <b>Table 3</b> | <b>Autistic</b> | <b>Non-Autistic</b> | <b>Autistic</b><br>US, AU, UK | <b>Non-Autistic</b><br>US, AU, UK |
|----------------|-----------------|---------------------|-------------------------------|-----------------------------------|

What is your age?

|                     | US    | AU    | UK    | US     | AU     | UK     |       |       |
|---------------------|-------|-------|-------|--------|--------|--------|-------|-------|
| <b>Total</b>        | 49    | 41    | 52    | 1088   | 1057   | 1048   |       |       |
| <b>18-24 (21)</b>   | 9     | 7     | 10    | 116    | 149    | 154    |       |       |
| <b>25-34 (29.5)</b> | 16    | 14    | 25    | 249    | 225    | 206    | 18.2% | 13.2% |
| <b>35-44 (39.5)</b> | 20    | 10    | 11    | 271    | 246    | 231    | 38.3% | 21.3% |
| <b>45-54 (49.5)</b> | 3     | 9     | 5     | 249    | 232    | 238    | 28.8% | 23.4% |
| <b>55-65 (60)</b>   | 1     | 1     | 1     | 203    | 205    | 219    | 12.6% | 22.5% |
|                     | 2.00% | 2.40% | 1.90% | 18.70% | 19.40% | 20.90% | 2.1%  | 19.7% |

**Table 4**

US Region.

|                  | US      |  | US      |  |  |
|------------------|---------|--|---------|--|--|
| <b>Total</b>     | 49      |  | 1088    |  |  |
|                  | 100.00% |  | 100.00% |  |  |
| <b>Northeast</b> | 9       |  | 198     |  |  |
|                  | 18.40%  |  | 18.20%  |  |  |
| <b>Midwest</b>   | 11      |  | 235     |  |  |
|                  | 22.40%  |  | 21.60%  |  |  |
| <b>South</b>     | 18      |  | 404     |  |  |
|                  | 36.70%  |  | 37.10%  |  |  |
| <b>West</b>      | 11      |  | 251     |  |  |
|                  | 22.40%  |  | 23.10%  |  |  |

**Table 5**

**AUTRALIA Region.**

|                                     | <b>AU</b>     | <b>AU</b>       |
|-------------------------------------|---------------|-----------------|
| <b>Total</b>                        | 41<br>100.00% | 1057<br>100.00% |
| <b>Australian Capital Territory</b> | -<br>-        | 20<br>1.90%     |
| <b>New South Wales</b>              | 15<br>36.60%  | 345<br>32.60%   |
| <b>Northern Territory</b>           | -<br>-        | 7<br>0.70%      |
| <b>Queensland</b>                   | 9<br>22.00%   | 208<br>19.70%   |
| <b>South Australia</b>              | 2<br>4.90%    | 83<br>7.90%     |
| <b>Tasmania</b>                     | 1<br>2.40%    | 24<br>2.30%     |
| <b>Victoria</b>                     | 8<br>19.50%   | 270<br>25.50%   |
| <b>Western Australia</b>            | 6<br>14.60%   | 100<br>9.50%    |

**Table 6**

**UK Region.**

|                                   |  | UK      |  | UK      |
|-----------------------------------|--|---------|--|---------|
| <b>Total</b>                      |  | 52      |  | 1048    |
|                                   |  | 100.00% |  | 100.00% |
| <b>East Anglia</b>                |  | 4       |  | 95      |
|                                   |  | 7.70%   |  | 9.10%   |
| <b>East Midlands</b>              |  | 5       |  | 72      |
|                                   |  | 9.60%   |  | 6.90%   |
| <b>London</b>                     |  | 10      |  | 144     |
|                                   |  | 19.20%  |  | 13.70%  |
| <b>North East</b>                 |  | 3       |  | 41      |
|                                   |  | 5.80%   |  | 3.90%   |
| <b>Northern Ireland</b>           |  | 2       |  | 31      |
|                                   |  | 3.80%   |  | 3.00%   |
| <b>North West</b>                 |  | 7       |  | 114     |
|                                   |  | 13.50%  |  | 10.90%  |
| <b>Scotland</b>                   |  | 2       |  | 97      |
|                                   |  | 3.80%   |  | 9.30%   |
| <b>South East</b>                 |  | 6       |  | 137     |
|                                   |  | 11.50%  |  | 13.10%  |
| <b>South West</b>                 |  | 3       |  | 85      |
|                                   |  | 5.80%   |  | 8.10%   |
| <b>Wales</b>                      |  | 2       |  | 53      |
|                                   |  | 3.80%   |  | 5.10%   |
| <b>West Midlands</b>              |  | 6       |  | 93      |
|                                   |  | 11.50%  |  | 8.90%   |
| <b>Yorkshire &amp; Humberside</b> |  | 2       |  | 86      |
|                                   |  | 3.80%   |  | 8.20%   |

|                |                 |                     |                               |                                   |
|----------------|-----------------|---------------------|-------------------------------|-----------------------------------|
| <b>Table 7</b> | <b>Autistic</b> | <b>Non-Autistic</b> | <b>Autistic</b><br>US, AU, UK | <b>Non-Autistic</b><br>US, AU, UK |
|----------------|-----------------|---------------------|-------------------------------|-----------------------------------|

Q2. Do you experience any health problems when exposed to air fresheners or deodorizers?

|                            | US      | AU      | UK      | US      | AU      | UK      |       |       |
|----------------------------|---------|---------|---------|---------|---------|---------|-------|-------|
| <b>Total</b>               | 49      | 41      | 52      | 1088    | 1057    | 1048    |       |       |
|                            | 100.00% | 100.00% | 100.00% | 100.00% | 100.00% | 100.00% |       |       |
| <b>Yes</b>                 | 33      | 23      | 34      | 199     | 157     | 136     |       |       |
|                            | 67.30%  | 56.10%  | 65.40%  | 18.30%  | 14.90%  | 13.00%  | 62.9% | 15.4% |
| <b>No</b>                  | 11      | 13      | 11      | 780     | 747     | 787     |       |       |
|                            | 22.40%  | 31.70%  | 21.20%  | 71.70%  | 70.70%  | 75.10%  | 25.1% | 72.5% |
| <b>Don't know/not sure</b> | 4       | 5       | 7       | 105     | 152     | 123     |       |       |
|                            | 8.20%   | 12.20%  | 13.50%  | 9.70%   | 14.40%  | 11.70%  | 11.3% | 11.9% |
| <b>Decline to answer</b>   | 1       | -       | -       | 4       | 1       | 2       |       |       |
|                            | 2.00%   | -       | -       | 0.40%   | 0.10%   | 0.20%   | 2.0%  | 0.2%  |

| Table 8 | Autistic | Non-Autistic | Autistic<br>US, AU, UK | Non-Autistic<br>US, AU, UK |
|---------|----------|--------------|------------------------|----------------------------|
|---------|----------|--------------|------------------------|----------------------------|

BA. Which of the following health problems do you experience?

Base: Respondents who experienced below health problems when exposed to air fresheners or deodorizers

|                                                                                                     | US      | AU      | UK      | US      | AU      | UK      |       |       |
|-----------------------------------------------------------------------------------------------------|---------|---------|---------|---------|---------|---------|-------|-------|
| <b>Total</b>                                                                                        | 33      | 23      | 34      | 199     | 157     | 136     |       |       |
|                                                                                                     | 100.00% | 100.00% | 100.00% | 100.00% | 100.00% | 100.00% |       |       |
| <b>Migraine headaches</b>                                                                           | 14      | 9       | 10      | 68      | 37      | 30      |       |       |
|                                                                                                     | 42.40%  | 39.10%  | 29.40%  | 34.20%  | 23.60%  | 22.10%  | 37.0% | 26.6% |
| <b>Asthma attacks</b>                                                                               | 6       | 12      | 9       | 47      | 37      | 35      |       |       |
|                                                                                                     | 18.20%  | 52.20%  | 26.50%  | 23.60%  | 23.60%  | 25.70%  | 32.3% | 24.3% |
| <b>Neurological problems (e.g., dizziness, seizures, head pain, fainting, loss of coordination)</b> | 11      | 5       | 7       | 25      | 19      | 8       |       |       |
|                                                                                                     | 33.30%  | 21.70%  | 20.60%  | 12.60%  | 12.10%  | 5.90%   | 25.2% | 10.2% |
| <b>Respiratory problems (e.g., difficulty breathing, coughing, shortness of breath)</b>             | 11      | 10      | 7       | 97      | 90      | 69      |       |       |
|                                                                                                     | 33.30%  | 43.50%  | 20.60%  | 48.70%  | 57.30%  | 50.70%  | 32.5% | 52.2% |
| <b>Skin problems (e.g., rashes, hives, red skin, tingling skin, dermatitis)</b>                     | 11      | 8       | 11      | 54      | 45      | 39      |       |       |
|                                                                                                     | 33.30%  | 34.80%  | 32.40%  | 27.10%  | 28.70%  | 28.70%  | 33.5% | 28.2% |
| <b>Cognitive problems (e.g., difficulties thinking, concentrating, or remembering)</b>              | 10      | 7       | 7       | 21      | 14      | 7       |       |       |
|                                                                                                     | 30.30%  | 30.40%  | 20.60%  | 10.60%  | 8.90%   | 5.10%   | 27.1% | 8.2%  |
| <b>Mucosal symptoms (e.g., watery or red eyes, nasal congestion, sneezing)</b>                      | 11      | 10      | 7       | 75      | 58      | 42      |       |       |
|                                                                                                     | 33.30%  | 43.50%  | 20.60%  | 37.70%  | 36.90%  | 30.90%  | 32.5% | 35.2% |
| <b>Immune system problems (e.g., swollen lymph glands, fever, fatigue)</b>                          | 11      | 9       | 4       | 10      | 11      | 6       |       |       |
|                                                                                                     | 33.30%  | 39.10%  | 11.80%  | 5.00%   | 7.00%   | 4.40%   | 28.1% | 5.5%  |
| <b>Gastrointestinal problems (e.g., nausea, bloating, cramping, diarrhea)</b>                       | 10      | 6       | 10      | 21      | 10      | 7       |       |       |
|                                                                                                     | 30.30%  | 26.10%  | 29.40%  | 10.60%  | 6.40%   | 5.10%   | 28.6% | 7.4%  |
| <b>Cardiovascular problems (e.g., fast or irregular heartbeat, jitteriness, chest discomfort)</b>   | 12      | 11      | 14      | 18      | 10      | 9       |       |       |
|                                                                                                     | 36.40%  | 47.80%  | 41.20%  | 9.00%   | 6.40%   | 6.60%   | 41.8% | 7.3%  |
| <b>Musculoskeletal problems (e.g., muscle or joint pain, cramps, weakness)</b>                      | 14      | 7       | 8       | 13      | 11      | 3       |       |       |
|                                                                                                     | 42.40%  | 30.40%  | 23.50%  | 6.50%   | 7.00%   | 2.20%   | 32.1% | 5.2%  |
| <b>Other</b>                                                                                        | 1       | -       | 1       | 7       | 6       | 6       |       |       |
|                                                                                                     | 3.00%   | -       | 2.90%   | 3.50%   | 3.80%   | 4.40%   | 3.0%  | 3.9%  |



|         |          |              |            |              |
|---------|----------|--------------|------------|--------------|
| Table 9 | Autistic | Non-Autistic | Autistic   | Non-Autistic |
|         |          |              | US, AU, UK | US, AU, UK   |

Q3. Do you experience any health problems from the scent of laundry products coming from a dryer vent?

|                     | US      | AU      | UK      | US      | AU      | UK      |       |       |
|---------------------|---------|---------|---------|---------|---------|---------|-------|-------|
| Total               | 49      | 41      | 52      | 1088    | 1057    | 1048    |       |       |
|                     | 100.00% | 100.00% | 100.00% | 100.00% | 100.00% | 100.00% |       |       |
| Yes                 | 35      | 21      | 26      | 107     | 46      | 40      |       |       |
|                     | 71.40%  | 51.20%  | 50.00%  | 9.80%   | 4.40%   | 3.80%   | 57.5% | 37.0% |
| No                  | 14      | 18      | 20      | 892     | 891     | 906     |       |       |
|                     | 28.60%  | 43.90%  | 38.50%  | 82.00%  | 84.30%  | 86.50%  | 37.0% | 84.3% |
| Don't know/not sure | -       | 2       | 6       | 88      | 118     | 101     |       |       |
|                     | -       | 4.90%   | 11.50%  | 8.10%   | 11.20%  | 9.60%   | 8.2%  | 9.6%  |
| Decline to answer   | -       | -       | -       | 1       | 2       | 1       |       |       |
|                     | -       | -       | -       | 0.10%   | 0.20%   | 0.10%   |       |       |

| Table 10 | Autistic | Non-Autistic | Autistic<br>US, AU, UK | Non-Autistic<br>US, AU, UK |
|----------|----------|--------------|------------------------|----------------------------|
|----------|----------|--------------|------------------------|----------------------------|

BA. Which of the following health problems do you experience?

Base: Respondents who experienced below health problems from the scent of laundry products coming from a dryer vent

|                                                                                                     | US      | AU      | UK      | US      | AU      | UK      |       |       |
|-----------------------------------------------------------------------------------------------------|---------|---------|---------|---------|---------|---------|-------|-------|
| <b>Total</b>                                                                                        | 35      | 21      | 26      | 107     | 46      | 40      |       |       |
|                                                                                                     | 100.00% | 100.00% | 100.00% | 100.00% | 100.00% | 100.00% |       |       |
| <b>Migraine headaches</b>                                                                           | 9       | 5       | 7       | 28      | 9       | 8       |       |       |
|                                                                                                     | 25.70%  | 23.80%  | 26.90%  | 26.20%  | 19.60%  | 20.00%  | 25.5% | 21.9% |
| <b>Asthma attacks</b>                                                                               | 7       | 8       | 9       | 21      | 7       | 14      |       |       |
|                                                                                                     | 20.00%  | 38.10%  | 34.60%  | 19.60%  | 15.20%  | 35.00%  | 30.9% | 23.3% |
| <b>Neurological problems (e.g., dizziness, seizures, head pain, fainting, loss of coordination)</b> | 10      | 5       | 5       | 14      | 3       | 3       |       |       |
|                                                                                                     | 28.60%  | 23.80%  | 19.20%  | 13.10%  | 6.50%   | 7.50%   | 23.9% | 9.0%  |
| <b>Respiratory problems (e.g., difficulty breathing, coughing, shortness of breath)</b>             | 12      | 9       | 7       | 34      | 19      | 14      |       |       |
|                                                                                                     | 34.30%  | 42.90%  | 26.90%  | 31.80%  | 41.30%  | 35.00%  | 34.7% | 36.0% |
| <b>Skin problems (e.g., rashes, hives, red skin, tingling skin, dermatitis)</b>                     | 14      | 9       | 6       | 27      | 14      | 11      |       |       |
|                                                                                                     | 40.00%  | 42.90%  | 23.10%  | 25.20%  | 30.40%  | 27.50%  | 35.3% | 27.7% |
| <b>Cognitive problems (e.g., difficulties thinking, concentrating, or remembering)</b>              | 7       | 7       | 9       | 8       | 4       | 2       |       |       |
|                                                                                                     | 20.00%  | 33.30%  | 34.60%  | 7.50%   | 8.70%   | 5.00%   | 29.3% | 7.1%  |
| <b>Mucosal symptoms (e.g., watery or red eyes, nasal congestion, sneezing)</b>                      | 11      | 6       | 7       | 37      | 11      | 5       |       |       |
|                                                                                                     | 31.40%  | 28.60%  | 26.90%  | 34.60%  | 23.90%  | 12.50%  | 29.0% | 23.7% |
| <b>Immune system problems (e.g., swollen lymph glands, fever, fatigue)</b>                          | 13      | 11      | 5       | 6       | 9       | 4       |       |       |
|                                                                                                     | 37.10%  | 52.40%  | 19.20%  | 5.60%   | 19.60%  | 10.00%  | 36.2% | 11.7% |
| <b>Gastrointestinal problems (e.g., nausea, bloating, cramping, diarrhea)</b>                       | 13      | 5       | 7       | 16      | 8       | -       |       |       |
|                                                                                                     | 37.10%  | 23.80%  | 26.90%  | 15.00%  | 17.40%  | -       | 29.3% | 16.2% |
| <b>Cardiovascular problems (e.g., fast or irregular heartbeat, jitteriness, chest discomfort)</b>   | 6       | 9       | 4       | 9       | 6       | 2       |       |       |
|                                                                                                     | 17.10%  | 42.90%  | 15.40%  | 8.40%   | 13.00%  | 5.00%   | 25.1% | 8.8%  |
| <b>Musculoskeletal problems (e.g., muscle or joint pain, cramps, weakness)</b>                      | 16      | 8       | 6       | 7       | 2       | 2       |       |       |
|                                                                                                     | 45.70%  | 38.10%  | 23.10%  | 6.50%   | 4.30%   | 5.00%   | 35.6% | 5.3%  |
| <b>Other</b>                                                                                        | 1       | -       | -       | 3       | 2       | 1       |       |       |
|                                                                                                     | 2.90%   | -       | -       | 2.80%   | 4.30%   | 2.50%   | 2.9%  | 3.2%  |

|                 |                 |                     |                 |                     |
|-----------------|-----------------|---------------------|-----------------|---------------------|
| <b>Table 11</b> | <b>Autistic</b> | <b>Non-Autistic</b> | <b>Autistic</b> | <b>Non-Autistic</b> |
|                 |                 |                     | US, AU, UK      | US, AU, UK          |

Q4. Do you experience any health problems from being in a room after it has been cleaned with scented products?

|                            | US      | AU      | UK      | US      | AU      | UK      |       |       |
|----------------------------|---------|---------|---------|---------|---------|---------|-------|-------|
| <b>Total</b>               | 49      | 41      | 52      | 1088    | 1057    | 1048    |       |       |
|                            | 100.00% | 100.00% | 100.00% | 100.00% | 100.00% | 100.00% |       |       |
| <b>Yes</b>                 | 39      | 24      | 31      | 185     | 144     | 123     |       |       |
|                            | 79.60%  | 58.50%  | 59.60%  | 17.00%  | 13.60%  | 11.70%  | 65.9% | 45.0% |
| <b>No</b>                  | 10      | 14      | 15      | 829     | 803     | 824     |       |       |
|                            | 20.40%  | 34.10%  | 28.80%  | 76.20%  | 76.00%  | 78.60%  | 27.8% | 76.9% |
| <b>Don't know/not sure</b> | -       | 3       | 6       | 73      | 107     | 99      |       |       |
|                            | -       | 7.30%   | 11.50%  | 6.70%   | 10.10%  | 9.40%   | 9.4%  | 8.7%  |
| <b>Decline to answer</b>   | -       | -       | -       | 1       | 3       | 2       |       |       |
|                            | -       | -       | -       | 0.10%   | 0.30%   | 0.20%   |       |       |

| Table 12 | Autistic | Non-Autistic | Autistic<br>US, AU, UK | Non-Autistic<br>US, AU, UK |
|----------|----------|--------------|------------------------|----------------------------|
|----------|----------|--------------|------------------------|----------------------------|

BA. Which of the following health problems do you experience?

Base: Respondents who experienced below health problems from being in a room after it has been cleaned with scented products

|                                                                                              | US      | AU      | UK      | US      | AU      | UK      |       |       |
|----------------------------------------------------------------------------------------------|---------|---------|---------|---------|---------|---------|-------|-------|
| Total                                                                                        | 39      | 24      | 31      | 185     | 144     | 123     |       |       |
|                                                                                              | 100.00% | 100.00% | 100.00% | 100.00% | 100.00% | 100.00% |       |       |
| Migraine headaches                                                                           | 12      | 8       | 12      | 63      | 30      | 29      |       |       |
|                                                                                              | 30.80%  | 33.30%  | 38.70%  | 34.10%  | 20.80%  | 23.60%  | 34.3% | 26.2% |
| Asthma attacks                                                                               | 7       | 7       | 9       | 39      | 20      | 24      |       |       |
|                                                                                              | 17.90%  | 29.20%  | 29.00%  | 21.10%  | 13.90%  | 19.50%  | 25.4% | 18.2% |
| Neurological problems (e.g., dizziness, seizures, head pain, fainting, loss of coordination) | 14      | 6       | 8       | 33      | 11      | 10      |       |       |
|                                                                                              | 35.90%  | 25.00%  | 25.80%  | 17.80%  | 7.60%   | 8.10%   | 28.9% | 11.2% |
| Respiratory problems (e.g., difficulty breathing, coughing, shortness of breath)             | 11      | 9       | 10      | 98      | 73      | 56      |       |       |
|                                                                                              | 28.20%  | 37.50%  | 32.30%  | 53.00%  | 50.70%  | 45.50%  | 32.7% | 49.7% |
| Skin problems (e.g., rashes, hives, red skin, tingling skin, dermatitis)                     | 12      | 9       | 10      | 33      | 22      | 26      |       |       |
|                                                                                              | 30.80%  | 37.50%  | 32.30%  | 17.80%  | 15.30%  | 21.10%  | 33.5% | 18.1% |
| Cognitive problems (e.g., difficulties thinking, concentrating, or remembering)              | 12      | 9       | 7       | 19      | 11      | 9       |       |       |
|                                                                                              | 30.80%  | 37.50%  | 22.60%  | 10.30%  | 7.60%   | 7.30%   | 30.3% | 8.4%  |
| Mucosal symptoms (e.g., watery or red eyes, nasal congestion, sneezing)                      | 11      | 9       | 8       | 72      | 57      | 33      |       |       |
|                                                                                              | 28.20%  | 37.50%  | 25.80%  | 38.90%  | 39.60%  | 26.80%  | 30.5% | 35.1% |
| Immune system problems (e.g., swollen lymph glands, fever, fatigue)                          | 13      | 12      | 2       | 10      | 6       | 7       |       |       |
|                                                                                              | 33.30%  | 50.00%  | 6.50%   | 5.40%   | 4.20%   | 5.70%   | 29.9% | 5.1%  |
| Gastrointestinal problems (e.g., nausea, bloating, cramping, diarrhea)                       | 7       | 7       | 5       | 25      | 9       | 6       |       |       |
|                                                                                              | 17.90%  | 29.20%  | 16.10%  | 13.50%  | 6.30%   | 4.90%   | 21.1% | 8.2%  |
| Cardiovascular problems (e.g., fast or irregular heartbeat, jitteriness, chest discomfort)   | 12      | 6       | 9       | 14      | 8       | 2       |       |       |
|                                                                                              | 30.80%  | 25.00%  | 29.00%  | 7.60%   | 5.60%   | 1.60%   | 28.3% | 4.9%  |
| Musculoskeletal problems (e.g., muscle or joint pain, cramps, weakness)                      | 12      | 8       | 6       | 11      | 3       | 1       |       |       |
|                                                                                              | 30.80%  | 33.30%  | 19.40%  | 5.90%   | 2.10%   | 0.80%   | 27.8% | 2.9%  |
| Other                                                                                        | 1       | -       | -       | 3       | 7       | 9       |       |       |
|                                                                                              | 2.60%   | -       | -       | 1.60%   | 4.90%   | 7.30%   | 2.6%  | 4.6%  |

|                 |                 |                     |                 |                     |
|-----------------|-----------------|---------------------|-----------------|---------------------|
| <b>Table 13</b> | <b>Autistic</b> | <b>Non-Autistic</b> | <b>Autistic</b> | <b>Non-Autistic</b> |
|                 |                 |                     | US, AU, UK      | US, AU, UK          |

Q5. Do you experience any health problems from being near someone who is wearing a fragranced product?

|                            | US      | AU      | UK      | US      | AU      | UK      |       |       |
|----------------------------|---------|---------|---------|---------|---------|---------|-------|-------|
| <b>Total</b>               | 49      | 41      | 52      | 1088    | 1057    | 1048    |       |       |
|                            | 100.00% | 100.00% | 100.00% | 100.00% | 100.00% | 100.00% |       |       |
| <b>Yes</b>                 | 32      | 24      | 30      | 236     | 189     | 121     |       |       |
|                            | 65.30%  | 58.50%  | 57.70%  | 21.70%  | 17.90%  | 11.50%  | 60.5% | 17.0% |
| <b>No</b>                  | 15      | 14      | 15      | 784     | 779     | 857     |       |       |
|                            | 30.60%  | 34.10%  | 28.80%  | 72.10%  | 73.70%  | 81.80%  | 31.2% | 75.9% |
| <b>Don't know/not sure</b> | 2       | 3       | 7       | 66      | 87      | 69      |       |       |
|                            | 4.10%   | 7.30%   | 13.50%  | 6.10%   | 8.20%   | 6.60%   | 8.3%  | 7.0%  |
| <b>Decline to answer</b>   | -       | -       | -       | 2       | 2       | 1       |       |       |
|                            | -       | -       | -       | 0.20%   | 0.20%   | 0.10%   |       |       |

|                 |                 |                     |                                |                                    |
|-----------------|-----------------|---------------------|--------------------------------|------------------------------------|
| <b>Table 14</b> | <b>Autistic</b> | <b>Non-Autistic</b> | <b>Autistic<br/>US, AU, UK</b> | <b>Non-Autistic<br/>US, AU, UK</b> |
|-----------------|-----------------|---------------------|--------------------------------|------------------------------------|

**BA. Which of the following health problems do you experience?**

Base: Respondents who experienced below health problems from being near someone who is wearing a fragranced product

|                                                                                                     | US      | AU      | UK      | US      | AU      | UK      |       |       |
|-----------------------------------------------------------------------------------------------------|---------|---------|---------|---------|---------|---------|-------|-------|
| <b>Total</b>                                                                                        | 32      | 24      | 30      | 236     | 189     | 121     |       |       |
|                                                                                                     | 100.00% | 100.00% | 100.00% | 100.00% | 100.00% | 100.00% |       |       |
| <b>Migraine headaches</b>                                                                           | 8       | 8       | 8       | 88      | 46      | 29      |       |       |
|                                                                                                     | 25.00%  | 33.30%  | 26.70%  | 37.30%  | 24.30%  | 24.00%  | 28.3% | 28.5% |
| <b>Asthma attacks</b>                                                                               | 7       | 8       | 6       | 37      | 29      | 19      |       |       |
|                                                                                                     | 21.90%  | 33.30%  | 20.00%  | 15.70%  | 15.30%  | 15.70%  | 25.1% | 15.6% |
| <b>Neurological problems (e.g., dizziness, seizures, head pain, fainting, loss of coordination)</b> | 10      | 4       | 8       | 31      | 22      | 5       |       |       |
|                                                                                                     | 31.30%  | 16.70%  | 26.70%  | 13.10%  | 11.60%  | 4.10%   | 24.9% | 9.6%  |
| <b>Respiratory problems (e.g., difficulty breathing, coughing, shortness of breath)</b>             | 12      | 6       | 7       | 106     | 85      | 39      |       |       |
|                                                                                                     | 37.50%  | 25.00%  | 23.30%  | 44.90%  | 45.00%  | 32.20%  | 28.6% | 40.7% |
| <b>Skin problems (e.g., rashes, hives, red skin, tingling skin, dermatitis)</b>                     | 13      | 7       | 4       | 26      | 12      | 22      |       |       |
|                                                                                                     | 40.60%  | 29.20%  | 13.30%  | 11.00%  | 6.30%   | 18.20%  | 27.7% | 11.8% |
| <b>Cognitive problems (e.g., difficulties thinking, concentrating, or remembering)</b>              | 14      | 5       | 7       | 16      | 12      | 5       |       |       |
|                                                                                                     | 43.80%  | 20.80%  | 23.30%  | 6.80%   | 6.30%   | 4.10%   | 29.3% | 5.7%  |
| <b>Mucosal symptoms (e.g., watery or red eyes, nasal congestion, sneezing)</b>                      | 8       | 10      | 6       | 90      | 77      | 45      |       |       |
|                                                                                                     | 25.00%  | 41.70%  | 20.00%  | 38.10%  | 40.70%  | 37.20%  | 28.9% | 38.7% |
| <b>Immune system problems (e.g., swollen lymph glands, fever, fatigue)</b>                          | 9       | 9       | 4       | 10      | 5       | 1       |       |       |
|                                                                                                     | 28.10%  | 37.50%  | 13.30%  | 4.20%   | 2.60%   | 0.80%   | 26.3% | 2.5%  |
| <b>Gastrointestinal problems (e.g., nausea, bloating, cramping, diarrhea)</b>                       | 9       | 5       | 6       | 22      | 11      | 6       |       |       |
|                                                                                                     | 28.10%  | 20.80%  | 20.00%  | 9.30%   | 5.80%   | 5.00%   | 23.0% | 6.7%  |
| <b>Cardiovascular problems (e.g., fast or irregular heartbeat, jitteriness, chest discomfort)</b>   | 9       | 4       | 9       | 11      | 9       | 4       |       |       |
|                                                                                                     | 28.10%  | 16.70%  | 30.00%  | 4.70%   | 4.80%   | 3.30%   | 24.9% | 4.3%  |
| <b>Musculoskeletal problems (e.g., muscle or joint pain, cramps, weakness)</b>                      | 12      | 10      | 7       | 5       | 3       | 4       |       |       |
|                                                                                                     | 37.50%  | 41.70%  | 23.30%  | 2.10%   | 1.60%   | 3.30%   | 34.2% | 2.3%  |
| <b>Other</b>                                                                                        | 1       | -       | -       | 6       | 9       | 6       |       |       |
|                                                                                                     | 3.10%   | -       | -       | 2.50%   | 4.80%   | 5.00%   | 3.1%  | 4.1%  |

|          |          |              |            |              |
|----------|----------|--------------|------------|--------------|
| Table 15 | Autistic | Non-Autistic | Autistic   | Non-Autistic |
|          |          |              | US, AU, UK | US, AU, UK   |

Q6. In general, do you experience any health problems from exposure to any type of fragranced product?

|                            | US      | AU      | UK      | US      | AU      | UK      |       |       |
|----------------------------|---------|---------|---------|---------|---------|---------|-------|-------|
| <b>Total</b>               | 49      | 41      | 52      | 1088    | 1057    | 1048    |       |       |
|                            | 100.00% | 100.00% | 100.00% | 100.00% | 100.00% | 100.00% |       |       |
| <b>Yes</b>                 | 36      | 30      | 24      | 217     | 193     | 129     |       |       |
|                            | 73.50%  | 73.20%  | 46.20%  | 19.90%  | 18.30%  | 12.30%  | 64.3% | 16.8% |
| <b>No</b>                  | 12      | 10      | 19      | 784     | 768     | 811     |       |       |
|                            | 24.50%  | 24.40%  | 36.50%  | 72.10%  | 72.70%  | 77.40%  | 28.5% | 74.1% |
| <b>Don't know/not sure</b> | 1       | 1       | 9       | 86      | 95      | 107     |       |       |
|                            | 2.00%   | 2.40%   | 17.30%  | 7.90%   | 9.00%   | 10.20%  | 7.2%  | 9.0%  |
| <b>Decline to answer</b>   | -       | -       | -       | 1       | 1       | 1       |       |       |
|                            | -       | -       | -       | 0.10%   | 0.10%   | 0.10%   |       |       |

| Table 16 | Autistic | Non-Autistic | Autistic<br>US, AU, UK | Non-Autistic<br>US, AU, UK |
|----------|----------|--------------|------------------------|----------------------------|
|----------|----------|--------------|------------------------|----------------------------|

BA. Which of the following health problems do you experience?

Base: Respondents who experienced below health problems from exposure to any type of fragranced product

|                                                                                                     | US      | AU      | UK      | US      | AU      | UK      |       |       |
|-----------------------------------------------------------------------------------------------------|---------|---------|---------|---------|---------|---------|-------|-------|
| <b>Total</b>                                                                                        | 36      | 30      | 24      | 217     | 193     | 129     |       |       |
|                                                                                                     | 100.00% | 100.00% | 100.00% | 100.00% | 100.00% | 100.00% |       |       |
| <b>Migraine headaches</b>                                                                           | 9       | 8       | 7       | 89      | 43      | 26      |       |       |
|                                                                                                     | 25.00%  | 26.70%  | 29.20%  | 41.00%  | 22.30%  | 20.20%  | 27.0% | 27.8% |
| <b>Asthma attacks</b>                                                                               | 8       | 9       | 5       | 47      | 31      | 25      |       |       |
|                                                                                                     | 22.20%  | 30.00%  | 20.80%  | 21.70%  | 16.10%  | 19.40%  | 24.3% | 19.1% |
| <b>Neurological problems (e.g., dizziness, seizures, head pain, fainting, loss of coordination)</b> | 17      | 5       | 5       | 25      | 17      | 10      |       |       |
|                                                                                                     | 47.20%  | 16.70%  | 20.80%  | 11.50%  | 8.80%   | 7.80%   | 28.2% | 9.4%  |
| <b>Respiratory problems (e.g., difficulty breathing, coughing, shortness of breath)</b>             | 13      | 11      | 7       | 106     | 99      | 44      |       |       |
|                                                                                                     | 36.10%  | 36.70%  | 29.20%  | 48.80%  | 51.30%  | 34.10%  | 34.0% | 44.7% |
| <b>Skin problems (e.g., rashes, hives, red skin, tingling skin, dermatitis)</b>                     | 15      | 11      | 4       | 43      | 43      | 41      |       |       |
|                                                                                                     | 41.70%  | 36.70%  | 16.70%  | 19.80%  | 22.30%  | 31.80%  | 31.7% | 24.6% |
| <b>Cognitive problems (e.g., difficulties thinking, concentrating, or remembering)</b>              | 13      | 7       | 4       | 18      | 12      | 9       |       |       |
|                                                                                                     | 36.10%  | 23.30%  | 16.70%  | 8.30%   | 6.20%   | 7.00%   | 25.4% | 7.2%  |
| <b>Mucosal symptoms (e.g., watery or red eyes, nasal congestion, sneezing)</b>                      | 12      | 10      | 5       | 90      | 73      | 43      |       |       |
|                                                                                                     | 33.30%  | 33.30%  | 20.80%  | 41.50%  | 37.80%  | 33.30%  | 29.1% | 37.5% |
| <b>Immune system problems (e.g., swollen lymph glands, fever, fatigue)</b>                          | 11      | 7       | 4       | 13      | 6       | 7       |       |       |
|                                                                                                     | 30.60%  | 23.30%  | 16.70%  | 6.00%   | 3.10%   | 5.40%   | 23.5% | 4.8%  |
| <b>Gastrointestinal problems (e.g., nausea, bloating, cramping, diarrhea)</b>                       | 7       | 3       | 7       | 26      | 11      | 4       |       |       |
|                                                                                                     | 19.40%  | 10.00%  | 29.20%  | 12.00%  | 5.70%   | 3.10%   | 19.5% | 6.9%  |
| <b>Cardiovascular problems (e.g., fast or irregular heartbeat, jitteriness, chest discomfort)</b>   | 10      | 5       | 7       | 8       | 8       | 6       |       |       |
|                                                                                                     | 27.80%  | 16.70%  | 29.20%  | 3.70%   | 4.10%   | 4.70%   | 24.6% | 4.2%  |
| <b>Musculoskeletal problems (e.g., muscle or joint pain, cramps, weakness)</b>                      | 13      | 9       | 7       | 7       | 2       | 3       |       |       |
|                                                                                                     | 36.10%  | 30.00%  | 29.20%  | 3.20%   | 1.00%   | 2.30%   | 31.8% | 2.2%  |
| <b>Other</b>                                                                                        | 1       | -       | -       | 2       | 8       | 10      |       |       |
|                                                                                                     | 2.80%   | -       | -       | 0.90%   | 4.10%   | 7.80%   | 2.8%  | 4.3%  |



|                 |                 |                     |                               |                                   |
|-----------------|-----------------|---------------------|-------------------------------|-----------------------------------|
| <b>Table 17</b> | <b>Autistic</b> | <b>Non-Autistic</b> | <b>Autistic</b><br>US, AU, UK | <b>Non-Autistic</b><br>US, AU, UK |
|-----------------|-----------------|---------------------|-------------------------------|-----------------------------------|

Disability definition question:

**US: Do any of these health problems substantially limit one or more major life activities, such as seeing, hearing, eating, sleeping, walking, standing, lifting, bending, speaking, breathing, learning, reading, concentrating, thinking, communicating, or working, for you personally?**

**AU: Do any of these health problems mean a total or partial loss of bodily or mental functions, for you personally?**

**UK: Do any of these health problems cause a substantial, likely to recur, and adverse effect on your ability to carry out normal day-to-day activities?**

|                            | US      | AU      | UK      | US     | AU      | UK      |       |       |
|----------------------------|---------|---------|---------|--------|---------|---------|-------|-------|
| <b>Total</b>               | 41      | 34      | 44      | 353    | 328     | 262     |       |       |
|                            | 100.00% | 100.00% | 100.00% | 100.0% | 100.00% | 100.00% |       |       |
| <b>Yes</b>                 | 35      | 28      | 24      | 160    | 34      | 54      |       |       |
|                            | 85.40%  | 82.40%  | 54.50%  | 45.3%  | 10.40%  | 20.60%  | 74.1% | 25.4% |
| <b>No</b>                  | 5       | 6       | 14      | 170    | 263     | 181     |       |       |
|                            | 12.20%  | 17.60%  | 31.80%  | 48.2%  | 80.20%  | 69.10%  | 20.5% | 65.8% |
| <b>Don't know/not sure</b> | 1       | -       | 6       | 21     | 31      | 27      |       |       |
|                            | 2.40%   | -       | 13.60%  | 5.9%   | 9.50%   | 10.30%  | 8.0%  | 8.6%  |
| <b>Decline to answer</b>   | -       | -       | -       | 2      | -       | -       |       |       |
|                            | -       | -       | -       | 0.6%   | -       | -       |       |       |

|                 |                 |  |  |                     |  |  |                 |                     |
|-----------------|-----------------|--|--|---------------------|--|--|-----------------|---------------------|
| <b>Table 18</b> | <b>Autistic</b> |  |  | <b>Non-Autistic</b> |  |  | <b>Autistic</b> | <b>Non-Autistic</b> |
|                 |                 |  |  |                     |  |  | US, AU, UK      | US, AU, UK          |

Has a doctor or health care professional ever told you that you have autism or autism spectrum disorder?

|                                                   | US      | AU      | UK      | US      | AU      | UK      |       |       |
|---------------------------------------------------|---------|---------|---------|---------|---------|---------|-------|-------|
| <b>Total</b>                                      | 49      | 41      | 52      | 1088    | 1057    | 1048    |       |       |
|                                                   | 100.00% | 100.00% | 100.00% | 100.00% | 100.00% | 100.00% |       |       |
| <b>Yes - autism</b>                               | 25      | 24      | 27      | -       | -       | -       |       |       |
|                                                   | 51.00%  | 58.50%  | 51.90%  | -       | -       | -       | 53.8% |       |
| <b>Yes - autism spectrum disorder</b>             | 26      | 26      | 29      | -       | -       | -       |       |       |
|                                                   | 53.10%  | 63.40%  | 55.80%  | -       | -       | -       | 57.4% |       |
| <b>No</b>                                         | -       | -       | -       | 1073    | 1025    | 1021    |       |       |
|                                                   | -       | -       | -       | 98.60%  | 97.00%  | 97.40%  |       | 97.7% |
| <b>Don't know/not sure</b>                        | -       | -       | -       | 13      | 30      | 26      |       |       |
|                                                   | -       | -       | -       | 1.20%   | 2.80%   | 2.50%   |       | 2.2%  |
| <b>Decline to answer</b>                          | -       | -       | -       | 2       | 2       | 1       |       |       |
|                                                   | -       | -       | -       | 0.20%   | 0.20%   | 0.10%   |       | 0.2%  |
| Percentages below relative to general population: | 1137    | 1098    | 1100    | 1137    | 1098    | 1100    |       |       |
| autism or autism spectrum disorder                | 49      | 41      | 52      |         |         |         | 4.3%  |       |
|                                                   | 4.3%    | 3.7%    | 4.7%    |         |         |         |       |       |
| autism                                            | 25      | 24      | 27      |         |         |         | 2.3%  |       |
|                                                   | 2.2%    | 2.2%    | 2.5%    |         |         |         |       |       |
| autism spectrum disorder                          | 26      | 26      | 29      |         |         |         | 2.4%  |       |
|                                                   | 2.3%    | 2.4%    | 2.6%    |         |         |         |       |       |
| not autistic                                      |         |         |         | 1088    | 1057    | 1048    |       | 95.7% |
|                                                   |         |         |         | 95.7%   | 96.3%   | 95.3%   |       |       |
| not autism or autism spectrum disorder            |         |         |         | 1073    | 1025    | 1021    |       | 93.5% |
|                                                   |         |         |         | 94.4%   | 93.4%   | 92.8%   |       |       |
| don't know/not sure                               |         |         |         | 13      | 30      | 26      |       | 2.1%  |
|                                                   |         |         |         | 1.1%    | 2.7%    | 2.4%    |       |       |
| decline to answer                                 |         |         |         | 2       | 2       | 1       |       | 0.1%  |
|                                                   |         |         |         | 0.2%    | 0.2%    | 0.1%    |       |       |

|                 |                 |                     |                               |                                   |
|-----------------|-----------------|---------------------|-------------------------------|-----------------------------------|
| <b>Table 19</b> | <b>Autistic</b> | <b>Non-Autistic</b> | <b>Autistic</b><br>US, AU, UK | <b>Non-Autistic</b><br>US, AU, UK |
|-----------------|-----------------|---------------------|-------------------------------|-----------------------------------|

Have you ever been unable or reluctant to use the restrooms in a public place, because of the presence of an air freshener, deodorizer, or scented product?

|                          | US      | AU      | UK      | US      | AU      | UK      |       |       |
|--------------------------|---------|---------|---------|---------|---------|---------|-------|-------|
| <b>Total</b>             | 49      | 41      | 52      | 1088    | 1057    | 1048    |       |       |
|                          | 100.00% | 100.00% | 100.00% | 100.00% | 100.00% | 100.00% |       |       |
| <b>Yes</b>               | 36      | 25      | 27      | 163     | 102     | 106     |       |       |
|                          | 73.50%  | 61.00%  | 51.90%  | 15.00%  | 9.60%   | 10.10%  | 62.1% | 11.6% |
| <b>No</b>                | 12      | 13      | 20      | 885     | 907     | 871     |       |       |
|                          | 24.50%  | 31.70%  | 38.50%  | 81.30%  | 85.80%  | 83.10%  | 31.6% | 83.4% |
| <b>Neutral/not sure</b>  | 1       | 3       | 4       | 39      | 46      | 68      |       |       |
|                          | 2.00%   | 7.30%   | 7.70%   | 3.60%   | 4.40%   | 6.50%   | 5.7%  | 4.8%  |
| <b>Decline to answer</b> | -       | -       | 1       | 1       | 2       | 3       |       |       |
|                          | -       | -       | 1.90%   | 0.10%   | 0.20%   | 0.30%   |       |       |

|                 |                 |                     |                               |                                   |
|-----------------|-----------------|---------------------|-------------------------------|-----------------------------------|
| <b>Table 20</b> | <b>Autistic</b> | <b>Non-Autistic</b> | <b>Autistic</b><br>US, AU, UK | <b>Non-Autistic</b><br>US, AU, UK |
|-----------------|-----------------|---------------------|-------------------------------|-----------------------------------|

If you enter a business, and you smell air fresheners or some fragranced product,  
do you want to leave as quickly as possible?

|                          | US      | AU      | UK      | US      | AU      | UK      |       |       |
|--------------------------|---------|---------|---------|---------|---------|---------|-------|-------|
| <b>Total</b>             | 49      | 41      | 52      | 1088    | 1057    | 1048    |       |       |
|                          | 100.00% | 100.00% | 100.00% | 100.00% | 100.00% | 100.00% |       |       |
| <b>Yes</b>               | 31      | 25      | 27      | 198     | 158     | 117     |       |       |
|                          | 63.30%  | 61.00%  | 51.90%  | 18.20%  | 14.90%  | 11.20%  | 58.7% | 14.8% |
| <b>No</b>                | 14      | 14      | 15      | 773     | 759     | 812     |       |       |
|                          | 28.60%  | 34.10%  | 28.80%  | 71.00%  | 71.80%  | 77.50%  | 30.5% | 73.4% |
| <b>Neutral/not sure</b>  | 4       | 2       | 10      | 116     | 139     | 115     |       |       |
|                          | 8.20%   | 4.90%   | 19.20%  | 10.70%  | 13.20%  | 11.00%  | 10.8% | 11.6% |
| <b>Decline to answer</b> | -       | -       | -       | 1       | 1       | 4       |       |       |
|                          | -       | -       | -       | 0.10%   | 0.10%   | 0.40%   |       |       |

|                 |                 |                     |                 |                     |
|-----------------|-----------------|---------------------|-----------------|---------------------|
| <b>Table 21</b> | <b>Autistic</b> | <b>Non-Autistic</b> | <b>Autistic</b> | <b>Non-Autistic</b> |
|                 |                 |                     | US, AU, UK      | US, AU, UK          |

Have you ever been unable or reluctant to wash your hands with soap in a public place, because you know or suspect that the soap is fragranced?

|                          | US      | AU      | UK      | US      | AU      | UK      |       |       |
|--------------------------|---------|---------|---------|---------|---------|---------|-------|-------|
| <b>Total</b>             | 49      | 41      | 52      | 1088    | 1057    | 1048    |       |       |
|                          | 100.00% | 100.00% | 100.00% | 100.00% | 100.00% | 100.00% |       |       |
| <b>Yes</b>               | 29      | 28      | 27      | 131     | 85      | 86      |       |       |
|                          | 59.20%  | 68.30%  | 51.90%  | 12.00%  | 8.00%   | 8.20%   | 59.8% | 9.4%  |
| <b>No</b>                | 16      | 13      | 20      | 908     | 898     | 879     |       |       |
|                          | 32.70%  | 31.70%  | 38.50%  | 83.50%  | 85.00%  | 83.90%  | 34.3% | 84.1% |
| <b>Neutral/not sure</b>  | 3       | -       | 4       | 47      | 72      | 78      |       |       |
|                          | 6.10%   | -       | 7.70%   | 4.30%   | 6.80%   | 7.40%   | 6.9%  | 6.2%  |
| <b>Decline to answer</b> | 1       | -       | 1       | 2       | 2       | 5       |       |       |
|                          | 2.00%   | -       | 1.90%   | 0.20%   | 0.20%   | 0.50%   | 2.0%  | 0.3%  |

|                 |                 |                     |                               |                                   |
|-----------------|-----------------|---------------------|-------------------------------|-----------------------------------|
| <b>Table 22</b> | <b>Autistic</b> | <b>Non-Autistic</b> | <b>Autistic</b><br>US, AU, UK | <b>Non-Autistic</b><br>US, AU, UK |
|-----------------|-----------------|---------------------|-------------------------------|-----------------------------------|

Have you ever been prevented from going to some place because you would be exposed to a fragrance product that would make you sick?

|                            | US      | AU      | UK      | US      | AU      | UK      |       |       |
|----------------------------|---------|---------|---------|---------|---------|---------|-------|-------|
| <b>Total</b>               | 49      | 41      | 52      | 1088    | 1057    | 1048    |       |       |
|                            | 100.00% | 100.00% | 100.00% | 100.00% | 100.00% | 100.00% |       |       |
| <b>Yes</b>                 | 37      | 29      | 28      | 221     | 136     | 120     |       |       |
|                            | 75.50%  | 70.70%  | 53.80%  | 20.30%  | 12.90%  | 11.50%  | 66.7% | 14.9% |
| <b>No</b>                  | 11      | 9       | 20      | 808     | 823     | 853     |       |       |
|                            | 22.40%  | 22.00%  | 38.50%  | 74.30%  | 77.90%  | 81.40%  | 27.6% | 77.9% |
| <b>Don't know/not sure</b> | -       | 3       | 3       | 58      | 96      | 73      |       |       |
|                            | -       | 7.30%   | 5.80%   | 5.30%   | 9.10%   | 7.00%   | 6.6%  | 7.1%  |
| <b>Decline to answer</b>   | 1       | -       | 1       | 1       | 2       | 2       |       |       |
|                            | 2.00%   | -       | 1.90%   | 0.10%   | 0.20%   | 0.20%   | 2.0%  | 0.2%  |
| <b>SUM</b>                 | 49      | 41      | 52      |         |         |         |       |       |
|                            | 100.00% | 100.00% | 100.00% |         |         |         |       |       |

|                 |                 |                     |                 |                     |
|-----------------|-----------------|---------------------|-----------------|---------------------|
| <b>Table 23</b> | <b>Autistic</b> | <b>Non-Autistic</b> | <b>Autistic</b> | <b>Non-Autistic</b> |
|                 |                 |                     | US, AU, UK      | US, AU, UK          |

Has any exposure to fragranced products in your work environment caused you to become sick, lose work days, or lose a job?

|                            | US      | AU      | UK      | US      | AU      | UK      |       |       |
|----------------------------|---------|---------|---------|---------|---------|---------|-------|-------|
| <b>Total</b>               | 49      | 41      | 52      | 1088    | 1057    | 1048    |       |       |
|                            | 100.00% | 100.00% | 100.00% | 100.00% | 100.00% | 100.00% |       |       |
| <b>Yes</b>                 | 35      | 28      | 20      | 137     | 57      | 49      |       |       |
|                            | 71.40%  | 68.30%  | 38.50%  | 12.60%  | 5.40%   | 4.70%   | 59.4% | 7.6%  |
| <b>No</b>                  | 12      | 11      | 23      | 898     | 918     | 930     |       |       |
|                            | 24.50%  | 26.80%  | 44.20%  | 82.50%  | 86.80%  | 88.70%  | 31.8% | 86.0% |
| <b>Don't know/not sure</b> | 2       | 2       | 8       | 52      | 79      | 66      |       |       |
|                            | 4.10%   | 4.90%   | 15.40%  | 4.80%   | 7.50%   | 6.30%   | 8.1%  | 6.2%  |
| <b>Decline to answer</b>   | -       | -       | 1       | 1       | 3       | 3       |       |       |
|                            | -       | -       | 1.90%   | 0.10%   | 0.30%   | 0.30%   |       |       |

|                 |                 |                     |                 |                     |
|-----------------|-----------------|---------------------|-----------------|---------------------|
| <b>Table 24</b> | <b>Autistic</b> | <b>Non-Autistic</b> | <b>Autistic</b> | <b>Non-Autistic</b> |
|                 |                 |                     | US, AU, UK      | US, AU, UK          |

Would you be supportive of a fragrance-free policy in the workplace?

|                          | US      | AU      | UK      | US      | AU      | UK      |       |       |
|--------------------------|---------|---------|---------|---------|---------|---------|-------|-------|
| <b>Total</b>             | 49      | 41      | 52      | 1088    | 1057    | 1048    |       |       |
|                          | 100.00% | 100.00% | 100.00% | 100.00% | 100.00% | 100.00% |       |       |
| <b>Yes</b>               | 28      | 32      | 32      | 576     | 438     | 460     |       |       |
|                          | 57.10%  | 78.00%  | 61.50%  | 52.90%  | 41.40%  | 43.90%  | 65.5% | 46.1% |
| <b>No</b>                | 13      | 6       | 16      | 211     | 238     | 240     |       |       |
|                          | 26.50%  | 14.60%  | 30.80%  | 19.40%  | 22.50%  | 22.90%  | 24.0% | 21.6% |
| <b>Neutral/not sure</b>  | 8       | 3       | 4       | 296     | 378     | 340     |       |       |
|                          | 16.30%  | 7.30%   | 7.70%   | 27.20%  | 35.80%  | 32.40%  | 10.4% | 31.8% |
| <b>Decline to answer</b> | -       | -       | -       | 5       | 3       | 8       |       |       |
|                          | -       | -       | -       | 0.50%   | 0.30%   | 0.80%   |       |       |



|          |          |              |            |              |
|----------|----------|--------------|------------|--------------|
| Table 25 | Autistic | Non-Autistic | Autistic   | Non-Autistic |
|          |          |              | US, AU, UK | US, AU, UK   |

Would you prefer that health care facilities and health care professionals be fragrance-free?

|                          | US      | AU      | UK      | US      | AU      | UK      |       |       |
|--------------------------|---------|---------|---------|---------|---------|---------|-------|-------|
| <b>Total</b>             | 49      | 41      | 52      | 1088    | 1057    | 1048    |       |       |
|                          | 100.00% | 100.00% | 100.00% | 100.00% | 100.00% | 100.00% |       |       |
| <b>Yes</b>               | 39      | 34      | 36      | 584     | 440     | 440     |       |       |
|                          | 79.60%  | 82.90%  | 69.20%  | 53.70%  | 41.60%  | 42.00%  | 77.2% | 45.8% |
| <b>No</b>                | 5       | 5       | 14      | 250     | 272     | 280     |       |       |
|                          | 10.20%  | 12.20%  | 26.90%  | 23.00%  | 25.70%  | 26.70%  | 16.4% | 25.1% |
| <b>Neutral/not sure</b>  | 4       | 2       | 2       | 250     | 340     | 322     |       |       |
|                          | 8.20%   | 4.90%   | 3.80%   | 23.00%  | 32.20%  | 30.70%  | 5.6%  | 28.6% |
| <b>Decline to answer</b> | 1       | -       | -       | 4       | 5       | 6       |       |       |
|                          | 2.00%   | -       | -       | 0.40%   | 0.50%   | 0.60%   | 2.0%  | 0.5%  |

|                 |                 |                     |                               |                                   |
|-----------------|-----------------|---------------------|-------------------------------|-----------------------------------|
| <b>Table 26</b> | <b>Autistic</b> | <b>Non-Autistic</b> | <b>Autistic</b><br>US, AU, UK | <b>Non-Autistic</b><br>US, AU, UK |
|-----------------|-----------------|---------------------|-------------------------------|-----------------------------------|

People Who Answer "Yes" To One Or More Of These Questions: Q2/Q3/Q4/Q5/Q6 (fragrance sensitive group).

|              | US      | AU      | UK      | US      | AU      | UK      |       |       |
|--------------|---------|---------|---------|---------|---------|---------|-------|-------|
| <b>Total</b> | 49      | 41      | 52      | 1088    | 1057    | 1048    | 142   | 3193  |
|              | 100.00% | 100.00% | 100.00% | 100.00% | 100.00% | 100.00% |       |       |
| <b>Yes</b>   | 41      | 34      | 44      | 353     | 328     | 262     | 119   | 943   |
|              | 83.70%  | 82.90%  | 84.60%  | 32.40%  | 31.00%  | 25.00%  | 83.7% | 29.5% |

|          |          |  |  |              |  |  |            |  |              |  |
|----------|----------|--|--|--------------|--|--|------------|--|--------------|--|
| Table 27 | Autistic |  |  | Non-Autistic |  |  | Autistic   |  | Non-Autistic |  |
|          |          |  |  |              |  |  | US, AU, UK |  | US, AU, UK   |  |

People who answer "Yes" to each type of health problem for each of these questions Q2/Q3/Q4/Q5/Q6.

|                                                                                                     | US      | AU      | UK      | US      | AU      | UK      |       |       |
|-----------------------------------------------------------------------------------------------------|---------|---------|---------|---------|---------|---------|-------|-------|
| <b>Total</b>                                                                                        | 49      | 41      | 52      | 1088    | 1057    | 1048    |       |       |
|                                                                                                     | 100.00% | 100.00% | 100.00% | 100.00% | 100.00% | 100.00% |       |       |
| <b>Migraine headaches</b>                                                                           | 22      | 17      | 22      | 157     | 93      | 70      |       |       |
|                                                                                                     | 44.90%  | 41.50%  | 42.30%  | 14.40%  | 8.80%   | 6.70%   | 42.9% | 10.0% |
| <b>Asthma attacks</b>                                                                               | 14      | 19      | 17      | 77      | 64      | 58      |       |       |
|                                                                                                     | 28.60%  | 46.30%  | 32.70%  | 7.10%   | 6.10%   | 5.50%   | 35.9% | 6.2%  |
| <b>Neurological problems (e.g., dizziness, seizures, head pain, fainting, loss of coordination)</b> | 20      | 12      | 17      | 62      | 37      | 24      |       |       |
|                                                                                                     | 40.80%  | 29.30%  | 32.70%  | 5.70%   | 3.50%   | 2.30%   | 34.3% | 3.8%  |
| <b>Respiratory problems (e.g., difficulty breathing, coughing, shortness of breath)</b>             | 23      | 20      | 20      | 188     | 163     | 108     |       |       |
|                                                                                                     | 46.90%  | 48.80%  | 38.50%  | 17.30%  | 15.40%  | 10.30%  | 44.7% | 14.3% |
| <b>Skin problems (e.g., rashes, hives, red skin, tingling skin, dermatitis)</b>                     | 19      | 18      | 19      | 102     | 86      | 89      |       |       |
|                                                                                                     | 38.80%  | 43.90%  | 36.50%  | 9.40%   | 8.10%   | 8.50%   | 39.7% | 8.7%  |
| <b>Cognitive problems (e.g., difficulties thinking, concentrating, or remembering)</b>              | 20      | 13      | 13      | 46      | 32      | 18      |       |       |
|                                                                                                     | 40.80%  | 31.70%  | 25.00%  | 4.20%   | 3.00%   | 1.70%   | 32.5% | 3.0%  |
| <b>Mucosal symptoms (e.g., watery or red eyes, nasal congestion, sneezing)</b>                      | 21      | 20      | 18      | 163     | 134     | 83      |       |       |
|                                                                                                     | 42.90%  | 48.80%  | 34.60%  | 15.00%  | 12.70%  | 7.90%   | 42.1% | 11.9% |
| <b>Immune system problems (e.g., swollen lymph glands, fever, fatigue)</b>                          | 18      | 18      | 7       | 27      | 18      | 14      |       |       |
|                                                                                                     | 36.70%  | 43.90%  | 13.50%  | 2.50%   | 1.70%   | 1.30%   | 31.4% | 1.8%  |
| <b>Gastrointestinal problems (e.g., nausea, bloating, cramping, diarrhea)</b>                       | 15      | 10      | 17      | 48      | 26      | 16      |       |       |
|                                                                                                     | 30.60%  | 24.40%  | 32.70%  | 4.40%   | 2.50%   | 1.50%   | 29.2% | 2.8%  |
| <b>Cardiovascular problems (e.g., fast or irregular heartbeat, jitteriness, chest discomfort)</b>   | 18      | 13      | 18      | 32      | 20      | 17      |       |       |
|                                                                                                     | 36.70%  | 31.70%  | 34.60%  | 2.90%   | 1.90%   | 1.60%   | 34.3% | 2.1%  |
| <b>Musculoskeletal problems (e.g., muscle or joint pain, cramps, weakness)</b>                      | 19      | 15      | 14      | 24      | 14      | 8       |       |       |
|                                                                                                     | 38.80%  | 36.60%  | 26.90%  | 2.20%   | 1.30%   | 0.80%   | 34.1% | 1.4%  |
| <b>Other</b>                                                                                        | 1       | -       | 1       | 18      | 21      | 22      |       |       |
|                                                                                                     | 2.00%   | -       | 1.90%   | 1.70%   | 2.00%   | 2.10%   | 2.0%  | 1.9%  |

|                 |                 |                     |  |  |                               |                                   |
|-----------------|-----------------|---------------------|--|--|-------------------------------|-----------------------------------|
| <b>Table 28</b> | <b>Autistic</b> | <b>Non-Autistic</b> |  |  | <b>Autistic</b><br>US, AU, UK | <b>Non-Autistic</b><br>US, AU, UK |
|-----------------|-----------------|---------------------|--|--|-------------------------------|-----------------------------------|

**Demographics.**

Base: Autistic, Non-Autistic

|                      | US      | AU      | UK      | US      | AU      | UK      |       |       |
|----------------------|---------|---------|---------|---------|---------|---------|-------|-------|
| <b>Total</b>         | 49      | 41      | 52      | 1088    | 1057    | 1048    |       |       |
|                      | 100.00% | 100.00% | 100.00% | 100.00% | 100.00% | 100.00% |       |       |
| <b>Male/Female</b>   |         |         |         |         |         |         |       |       |
| <b>All Males</b>     | 33      | 24      | 34      | 492     | 519     | 516     | 63.7% | 47.8% |
|                      | 67.30%  | 58.50%  | 65.40%  | 45.20%  | 49.10%  | 49.20%  |       |       |
| <b>All Females</b>   | 16      | 17      | 18      | 596     | 538     | 532     | 36.3% | 52.2% |
|                      | 32.70%  | 41.50%  | 34.60%  | 54.80%  | 50.90%  | 50.80%  |       |       |
| <b>Gender vs Age</b> |         |         |         |         |         |         |       |       |
| <b>Male 18-24</b>    | 6       | 5       | 6       | 41      | 65      | 77      | 12.0% | 5.7%  |
|                      | 12.20%  | 12.20%  | 11.50%  | 3.80%   | 6.10%   | 7.30%   |       |       |
| <b>Male 25-34</b>    | 13      | 7       | 15      | 117     | 102     | 87      | 24.1% | 9.6%  |
|                      | 26.50%  | 17.10%  | 28.80%  | 10.80%  | 9.60%   | 8.30%   |       |       |
| <b>Male 35-44</b>    | 12      | 6       | 8       | 124     | 113     | 99      | 18.2% | 10.5% |
|                      | 24.50%  | 14.60%  | 15.40%  | 11.40%  | 10.70%  | 9.40%   |       |       |
| <b>Male 45-54</b>    | 2       | 5       | 4       | 106     | 121     | 131     | 8.0%  | 11.2% |
|                      | 4.10%   | 12.20%  | 7.70%   | 9.70%   | 11.40%  | 12.50%  |       |       |
| <b>Male 55-65</b>    | -       | 1       | 1       | 104     | 118     | 122     | 2.2%  | 10.8% |
|                      | -       | 2.40%   | 1.90%   | 9.60%   | 11.20%  | 11.60%  |       |       |
| <b>Female 18-24</b>  | 3       | 2       | 4       | 75      | 84      | 77      | 6.2%  | 7.4%  |
|                      | 6.10%   | 4.90%   | 7.70%   | 6.90%   | 7.90%   | 7.30%   |       |       |
| <b>Female 25-34</b>  | 3       | 7       | 10      | 132     | 123     | 119     | 14.1% | 11.7% |
|                      | 6.10%   | 17.10%  | 19.20%  | 12.10%  | 11.60%  | 11.40%  |       |       |
| <b>Female 35-44</b>  | 8       | 4       | 3       | 147     | 133     | 132     | 10.6% | 12.9% |
|                      | 16.30%  | 9.80%   | 5.80%   | 13.50%  | 12.60%  | 12.60%  |       |       |
| <b>Female 45-54</b>  | 1       | 4       | 1       | 143     | 111     | 107     | 4.6%  | 11.3% |
|                      | 2.00%   | 9.80%   | 1.90%   | 13.10%  | 10.50%  | 10.20%  |       |       |
| <b>Female 55-65</b>  | 1       | -       | -       | 99      | 87      | 97      | 2.0%  | 8.9%  |
|                      | 2.00%   | -       | -       | 9.10%   | 8.20%   | 9.30%   |       |       |

**Table 29**

**Demographics.**

Base: General Population

US, AU, UK

|                      | US      | AU      | UK      |  |  |       |
|----------------------|---------|---------|---------|--|--|-------|
| <b>Total</b>         | 1137    | 1098    | 1100    |  |  |       |
|                      | 100.00% | 100.00% | 100.00% |  |  |       |
| <b>Male/Female</b>   |         |         |         |  |  |       |
| <b>All Males</b>     | 525     | 543     | 550     |  |  | 48.6% |
|                      | 46.20%  | 49.50%  | 50.00%  |  |  |       |
| <b>All Females</b>   | 612     | 555     | 550     |  |  | 51.4% |
|                      | 53.80%  | 50.50%  | 50.00%  |  |  |       |
| <b>Gender vs Age</b> |         |         |         |  |  |       |
| <b>Male 18-24</b>    | 47      | 70      | 83      |  |  | 6.0%  |
|                      | 4.10%   | 6.40%   | 7.50%   |  |  |       |
| <b>Male 25-34</b>    | 130     | 109     | 102     |  |  | 10.2% |
|                      | 11.40%  | 9.90%   | 9.30%   |  |  |       |
| <b>Male 35-44</b>    | 136     | 119     | 107     |  |  | 10.8% |
|                      | 12.00%  | 10.80%  | 9.70%   |  |  |       |
| <b>Male 45-54</b>    | 108     | 126     | 135     |  |  | 11.1% |
|                      | 9.50%   | 11.50%  | 12.30%  |  |  |       |
| <b>Male 55-65</b>    | 104     | 119     | 123     |  |  | 10.4% |
|                      | 9.10%   | 10.80%  | 11.20%  |  |  |       |
| <b>Female 18-24</b>  | 78      | 86      | 81      |  |  | 7.4%  |
|                      | 6.90%   | 7.80%   | 7.40%   |  |  |       |
| <b>Female 25-34</b>  | 135     | 130     | 129     |  |  | 11.8% |
|                      | 11.90%  | 11.80%  | 11.70%  |  |  |       |
| <b>Female 35-44</b>  | 155     | 137     | 135     |  |  | 12.8% |
|                      | 13.60%  | 12.50%  | 12.30%  |  |  |       |
| <b>Female 45-54</b>  | 144     | 115     | 108     |  |  | 11.0% |
|                      | 12.70%  | 10.50%  | 9.80%   |  |  |       |
| <b>Female 55-65</b>  | 100     | 87      | 97      |  |  | 8.5%  |
|                      | 8.80%   | 7.90%   | 8.80%   |  |  |       |

|          | Autistic |  |  | Non-Autistic |  |  | Autistic   | Non-Autistic |
|----------|----------|--|--|--------------|--|--|------------|--------------|
| Table 30 |          |  |  |              |  |  | US, AU, UK | US, AU, UK   |

Demographics.

Base: Autistic, Non-Autistic: Fragrance Sensitive

|                      | US      | AU      | UK      | US      | AU      | UK      |       |       |
|----------------------|---------|---------|---------|---------|---------|---------|-------|-------|
| <b>Total</b>         | 41      | 34      | 44      | 353     | 328     | 262     | 119   | 943   |
|                      | 100.00% | 100.00% | 100.00% | 100.00% | 100.00% | 100.00% |       |       |
| <b>Male/Female</b>   |         |         |         |         |         |         |       |       |
| <b>All Males</b>     | 28      | 21      | 28      | 145     | 123     | 113     | 64.6% | 40.6% |
|                      | 68.30%  | 61.80%  | 63.60%  | 41.10%  | 37.50%  | 43.10%  |       |       |
| <b>All Females</b>   | 13      | 13      | 16      | 208     | 205     | 149     | 35.4% | 59.4% |
|                      | 31.70%  | 38.20%  | 36.40%  | 58.90%  | 62.50%  | 56.90%  |       |       |
| <b>Gender vs Age</b> |         |         |         |         |         |         |       |       |
| <b>Male 18-24</b>    | 4       | 3       | 6       | 10      | 14      | 14      | 10.7% | 4.1%  |
|                      | 9.80%   | 8.80%   | 13.60%  | 2.80%   | 4.30%   | 5.30%   |       |       |
| <b>Male 25-34</b>    | 11      | 7       | 14      | 36      | 35      | 25      | 26.4% | 10.1% |
|                      | 26.80%  | 20.60%  | 31.80%  | 10.20%  | 10.70%  | 9.50%   |       |       |
| <b>Male 35-44</b>    | 11      | 6       | 7       | 44      | 22      | 23      | 20.1% | 9.3%  |
|                      | 26.80%  | 17.60%  | 15.90%  | 12.50%  | 6.70%   | 8.80%   |       |       |
| <b>Male 45-54</b>    | 2       | 5       | -       | 30      | 29      | 27      | 9.8%  | 9.2%  |
|                      | 4.90%   | 14.70%  | -       | 8.50%   | 8.80%   | 10.30%  |       |       |
| <b>Male 55-65</b>    | -       | -       | 1       | 25      | 23      | 24      | 2.3%  | 7.8%  |
|                      | -       | -       | 2.30%   | 7.10%   | 7.00%   | 9.20%   |       |       |
| <b>Female 18-24</b>  | 3       | 2       | 3       | 17      | 25      | 19      | 6.7%  | 6.6%  |
|                      | 7.30%   | 5.90%   | 6.80%   | 4.80%   | 7.60%   | 7.30%   |       |       |
| <b>Female 25-34</b>  | 2       | 5       | 9       | 48      | 38      | 32      | 13.4% | 12.5% |
|                      | 4.90%   | 14.70%  | 20.50%  | 13.60%  | 11.60%  | 12.20%  |       |       |
| <b>Female 35-44</b>  | 7       | 2       | 3       | 54      | 53      | 40      | 9.9%  | 15.6% |
|                      | 17.10%  | 5.90%   | 6.80%   | 15.30%  | 16.20%  | 15.30%  |       |       |
| <b>Female 45-54</b>  | 1       | 4       | 1       | 52      | 45      | 32      | 5.5%  | 13.5% |
|                      | 2.40%   | 11.80%  | 2.30%   | 14.70%  | 13.70%  | 12.20%  |       |       |
| <b>Female 55-65</b>  | -       | -       | -       | 37      | 44      | 26      |       | 11.3% |
|                      | -       | -       | -       | 10.50%  | 13.40%  | 9.90%   |       |       |
