# Supplementary material for: Fragranced consumer products: effects on autistic adults in the United States, Australia, and United Kingdom
Source: PubMed Central journal article supplement (PMC6244938; doi:10.1007/s11869-018-0625-x), 2018-09-25
Supplement: 11869_2018_625_MOESM2_ESM.pdf [file 11869_2018_625_MOESM2_ESM.pdf]

## Survey Methodology

Following Eysenbach G, 2004, Improving the Quality of Web Surveys: The Checklist for Reporting Results of Internet E-Surveys (CHERRIES), Journal of Medical Internet Research, Jul-Sep; 6(3): e34.

| <b>Checklist for Reporting Results of Internet E-Surveys (CHERRIES)</b> |                                                                               |                                                                                                                                                                                                                                                                                                                                                                                                                                                                                                                                                                                                                                                                                                                                                                                                                                                                                                                                                |
|-------------------------------------------------------------------------|-------------------------------------------------------------------------------|------------------------------------------------------------------------------------------------------------------------------------------------------------------------------------------------------------------------------------------------------------------------------------------------------------------------------------------------------------------------------------------------------------------------------------------------------------------------------------------------------------------------------------------------------------------------------------------------------------------------------------------------------------------------------------------------------------------------------------------------------------------------------------------------------------------------------------------------------------------------------------------------------------------------------------------------|
| <b>Item Category</b>                                                    | <b>Checklist Item</b>                                                         | <b>Explanation</b>                                                                                                                                                                                                                                                                                                                                                                                                                                                                                                                                                                                                                                                                                                                                                                                                                                                                                                                             |
| <b>Design</b>                                                           | Describe survey design                                                        | Target population: national random sample of adults (ages 18-65) in each country, the United States (US), Australia (AU), and the United Kingdom (UK), (n=1,137 US, n=1,097 AU, n=1,100 UK), representative of age, gender, and region in each country (confidence limit=95%, margin of error=3%). The survey drew upon participants from large web-based panels in each country (>5,000,000 US, >200,000 AU, >900,000 UK) held by Survey Sampling International (SSI). Participant recruitment followed a three-stage randomization process: first, participants are randomly selected from SSI panels and invited to take a survey; second, participants are combined with others into SSI's Dynamix sampling platform and respond to randomly selected profiling questions; and third, prospective participants are then randomly assigned to a survey. All responses were anonymous. Survey completion time was approximately ten minutes. |
|                                                                         | <b>IRB (Institutional Review Board) approval and informed consent process</b> |                                                                                                                                                                                                                                                                                                                                                                                                                                                                                                                                                                                                                                                                                                                                                                                                                                                                                                                                                |
|                                                                         | IRB approval                                                                  | Ethics approval was obtained by the University of Melbourne, School of Engineering Human Ethics Advisory Group, application 1646894, on May 9, 2016.                                                                                                                                                                                                                                                                                                                                                                                                                                                                                                                                                                                                                                                                                                                                                                                           |
|                                                                         | Informed consent                                                              | Participants had already provided informed consent as part of the SSI web-based panel. For this survey, participants were given the following introduction: aims of the study; principal researcher name, affiliation, and contact information; human ethics approval; length of survey (less than 15 minutes to complete); assurance that participation is completely voluntary and that all data provided are confidential; assurance that participants can withdraw at any time; outputs of research (findings will be provided through journal articles and website, free of charge); university human ethics contact information; and a specific question to indicate consent: "If you would like to participate in this project, please click the next button to proceed ('Go To Survey')."                                                                                                                                              |
|                                                                         | Data protection                                                               | Selected survey software and servers were used to ensure data protection. No personal information was linked to the survey results. The dataset (without any identifying information) is kept on password protected computers.                                                                                                                                                                                                                                                                                                                                                                                                                                                                                                                                                                                                                                                                                                                 |

## Development and pre-testing

Development and testing

The survey instrument was a 35-item questionnaire, developed and tested over a two-year period, including cognitive testing with 10 individuals and piloting with over 100 individuals, in each country, before full implementation in June 2016. This article reports results from the sub-populations of autistic and non-autistic individuals. Steinemann (2016, 2017, 2018) reports results from the general population surveys in the US, AU, and UK.

## Recruitment process and description of the sample having access to the questionnaire

The survey invitation is an open invitation, rather than a direct invite, to the pool of panelists available at the time. The pool is filtered to achieve a representative sample through a set of initial questions for basic demographic characteristics. SSI uses multiple sources to achieve a sample blend that is characteristic of the population, and response quotas for specific variables (e.g., age, gender, and region) ensure proportions that are representative of the population.

Open survey versus closed survey

Closed survey (only SSI participants), general population, random sample nationally representative of demographics.

Contact mode

The survey provider, SSI, provided an open invitation to potential participants. The survey targeted the general population rather than a specific cohort.

Advertising the survey

An open invitation was issued to randomly selected members of the web-based panel. The survey was not advertised.

## Survey administration

Web/E-mail

The survey was web-based, with multiple choice and open format answers. All responses were anonymous, and collected through the online survey platform and stored on local password protected servers.

Context

SSI is a survey research company and online panel provider.

Mandatory/voluntary

Voluntary. Prospective participants were randomly invited to the survey.

Incentives

Respondents were provided incentives for their participation by the panel provider, SSI, with points that can be redeemed for money or reward programs.

Time/Date

Data were collected within one week in June 2016.

Randomization of items or questionnaires

To prevent biases in response, five sets of questions were randomized for their multiple-choice items.

Adaptive questioning

Eight questions were conditionally displayed based on responses to other items.

Number of Items

The survey contained 35 questions. Each page contained one question with multiple choice and open format response categories.

Number of screens (pages)

Overall, 36 to 44 pages were presented (including the introductory page), depending on responses to conditional items.

Completeness check

All questions were required to be completed. All questions provided non-response options such as "don't know/not sure" and "decline to answer." Only completed surveys were included for analysis.

|                                                                    |                                                                                                                                                                                                                                                                                                                                        |                                                                                                                                                                                                                                                                                                                                                                                                                                                                                                                                                                                                                                                                                                                                                                                                                                                                                                                                                                                                                                                                                                                                                                |
|--------------------------------------------------------------------|----------------------------------------------------------------------------------------------------------------------------------------------------------------------------------------------------------------------------------------------------------------------------------------------------------------------------------------|----------------------------------------------------------------------------------------------------------------------------------------------------------------------------------------------------------------------------------------------------------------------------------------------------------------------------------------------------------------------------------------------------------------------------------------------------------------------------------------------------------------------------------------------------------------------------------------------------------------------------------------------------------------------------------------------------------------------------------------------------------------------------------------------------------------------------------------------------------------------------------------------------------------------------------------------------------------------------------------------------------------------------------------------------------------------------------------------------------------------------------------------------------------|
| <p><b>Response rates</b></p>                                       | <p>Review step</p> <p>Unique site visitor</p> <p>View rate (Ratio of unique survey visitors/unique site visitors)</p> <p>Participation rate (Ratio of unique visitors who agreed to participate/unique first survey page visitors)</p> <p>Completion rate (Ratio of users who finished the survey/users who agreed to participate)</p> | <p>Respondents were allowed one attempt per question, once they click "next" to review the next question; they are not allowed to go back to the previous questions or answers.</p> <p>US, AU, UK: Number of initial responses: 1201, 1183, 1139; Survey response rate: 95%, 93%, 97%; Number of drop outs: 46, 53, 18; Number of screen outs: 18, 32, 21; Number of completes: 1137, 1098, 1100; Panel size, over 5,000,000; over 200,000; over 900,000.</p> <p>Each respondent goes through stringent verification of identity upon signing up on SSI panel (including name, contact details, and IP). Once opt-in process is completed, each respondent is tagged with unique panel ID.</p> <p>not applicable</p> <p>SSI respondents are invited to survey through general population random selection. Unique clicks or visitors to the first page of the survey can be those who complete survey, drop out, or screen out.</p> <p>US 95% (1,201 initial, 46 drop out, 18 screen out, 1,137 complete).<br/>AU 93% (1,183 initial, 53 drop out, 32 screen out, 1,098 complete).<br/>UK 97% (1,139 initial, 18 drop out, 21 screen out, 1,100 complete).</p> |
| <p><b>Preventing multiple entries from the same individual</b></p> | <p>Cookies used</p> <p>IP check</p> <p>Log file analysis</p> <p>Registration</p>                                                                                                                                                                                                                                                       | <p>not used</p> <p>SSI programming software and sampling tool, Dynamix, controls the traffic and ensures unique entries. Using unique Panel ID and IP, each respondent can attempt the survey only once.</p> <p>not used</p> <p>This is a closed survey for SSI respondents only. Survey invite is mailed specifically to the e-mail address used upon joining survey and verified.</p>                                                                                                                                                                                                                                                                                                                                                                                                                                                                                                                                                                                                                                                                                                                                                                        |
| <p><b>Analysis</b></p>                                             | <p>Handling of incomplete questionnaires</p> <p>Questionnaires submitted with an atypical timestamp</p> <p>Statistical correction</p>                                                                                                                                                                                                  | <p>Only completed questionnaires were included in the final dataset for analysis.</p> <p>Minimum survey completion time was 5 minutes; average was 10 minutes. A small number of respondents were omitted for completing the items too quickly.</p> <p>All demographic subgroups obtained statistically valid numbers to ensure a national representativeness.</p>                                                                                                                                                                                                                                                                                                                                                                                                                                                                                                                                                                                                                                                                                                                                                                                             |
